# Supplementary material
Source: HighWire-hosted journal article supplement (https://www.rcpjournals.org/highwire/filestream/11677/field_highwire_adjunct_files/1/Collins_supplementary_material_S2.pdf)
Supplement: Collins_supplementary_material_S2.pdf [file Collins_supplementary_material_S2.pdf]

Format of feedback form:

| Feedback form questions                                                        | Feedback method                               |
|--------------------------------------------------------------------------------|-----------------------------------------------|
| Which site are you from?                                                       | Multiple choice                               |
| What grade are you?                                                            | Multiple choice                               |
| The content was at an appropriate level                                        | 1-5 (1= strongly disagree, 5= strongly agree) |
| The content was relevant                                                       | 1-5 (1= strongly disagree, 5= strongly agree) |
| The aims and objectives were clear                                             | 1-5 (1= strongly disagree, 5= strongly agree) |
| The presentation was well organised                                            | 1-5 (1= strongly disagree, 5= strongly agree) |
| The presenter was enthusiastic about their subject                             | 1-5 (1= strongly disagree, 5= strongly agree) |
| The teaching was given at the right pace                                       | 1-5 (1= strongly disagree, 5= strongly agree) |
| The session was the right length                                               | 1-5 (1= strongly disagree, 5= strongly agree) |
| My overall rating for the session is...                                        | 1-5 (1= poor, 5= excellent)                   |
| What was good about the session?                                               | Freetext                                      |
| What could be improved?                                                        | Freetext                                      |
| Do you have any other suggestions or comments about teaching during this time? | Freetext                                      |
| How did you find the mode of delivery?                                         | Freetext                                      |
